# Supplementary material for: Organ sculpting by patterned extracellular matrix stiffness
Source: eLife. 2017 Jun 27;6:e24958. doi: 10.7554/eLife.24958 (PMC5503509; doi:10.7554/eLife.24958)
Supplement: Supplementary file 1. — DOI: http://dx.doi.org/10.7554/eLife.24958.019 [file elife-24958-supp1.xlsx]

## Sheet: Sheet1
Figure	Panel	Genotype	Temperature	N
1	A	vkg-GFP	-	-
	A,C,D	Ore-R	-	56
	E	fat2[KO]	-	23
	E	tj-Gal4, vkg-GFP/UAS-msn KD[HMJ02084]; tubGal80[TS]	29C° 3 days	19
2	A	Ore-R	-	64
	B	tj-Gal4/UAS-SPARC KD[HMS02133]; tubGal80[TS]/+	29C° 4 days	36
	C	tj-Gal4/UAS-vkg KD[111688]; tubGal80[TS]/UAS-cg25c KD [HMC02910]	29C° 3 days	32
	D	tj-Gal4, vkg-GFP/UAS-msn KD[HMJ02084]; tubGal80[TS]	29C° 3 days	35
	E	fat2[KO]	-	45
	F	tj-Gal4/UAS-ehbp1; tubGal80[TS]/+	22C° 3-4 days	38
	G	UAS-vkg KD[111688]/+; mirr-Gal4, tubG80[TS]/UAS-cg25c KD [HMC02910]	31C° 3 days	25
	H	UAS-ehbp1/+; fru-Gal4[TS]/+	29C° 3-4 days	35
	I	tj-Gal4/+; UAS-nlsGFP/+	-
	J	mirr-Gal4/UAS-nls-GFP	-
	K	fru-Gal4/UAS-nls-GFP	-
	L	Same genotypes as above	-
	L	yw,GSV-trol/+;tj-Gal4/+; tubGal80[TS]	29C° 3 days	34
	L	tj-Gal4/UAS-domeΔCyt[3-1]; tubGal80[TS]/+	29C° 3 days	65
3	B	yw; vkg-GFP; His2Av-mRFP	-	7
	C,D	Ore-R	-	143
	C,D	fat2[KO]	-	138
	C,D	Ore-R + Collagenase	-	154
	C,D	Ore-R + LaTA	-	169
	F,G	tj-Gal4/UAS-ehbp1; tubGal80[TS]/+	as in figure 3	79
	F,G	UAS-vkg KD[111688]/+; mirr-Gal4, tubG80[TS]/UAS-cg25c KD [HMC02910]	as in figure 3	82
	F,G	UAS-ehbp1/+; fru-Gal4[TS]/+	as in figure 3	74
	F,G	tj-Gal4/UAS-vkg KD[111688]; tubGal80[TS]/UAS-cg25c KD [HMC02910]	as in figure 3	77
	F,G	tj-Gal4/UAS-SPARC KD[HMS02133]; tubGal80[TS]/+	as in figure 3	87
	F,G	yw,GSV-trol/+;tj-Gal4/+; tubGal80[TS]	as in figure 3	75
	F,G	tj-Gal4, vkg-GFP/UAS-msn KD[HMJ02084]; tubGal80[TS]	as in figure 3	80
	F,G	fat2[KO]	as in figure 3	73
	F,G	Ore-R	as in figure 3	68
	F,G	Ore-R + Collagenase	-	77
	F,G	Ore-R + LaTA	-	65
4	B-F	Ore-R	-	23
	B-F	fat2[KO]	-	24
	B-F	tj-Gal4, vkg-GFP/UAS-domeΔCyt[3-1]; tubGal80[TS]/+	29C° 3 days	20
	B-F	yw,UAS-trol[GS7407]/+;tj-Gal4/vkg-GFP; tubGal80[TS]/+	29C° 3 days	21
	B	tj-Gal4/UAS-SPARC KD[HMS02133]; tubGal80[TS]/+	29C° 4 days	20
	B	tj-Gal4/UAS-vkg KD[111688]; tubGal80[TS]/UAS-cg25c KD [HMC02910]	29C° 3 days	22
5	A	vkg-GFP[CC00791]/CyO	-	16
	B	trol-GFP[CA06698]	-	10
	C	lanB1-GFP[32973]	-	9
	D	vkg-GFP/CyO; fat2[KO]	-	18
	E	tj-Gal4, vkg-GFP/UAS-domeΔCyt[3-1]; tubGal80[TS]/+	29C° 3 days	16
	F	yw; vkg[ICO] FRT40A/Cyo	-	19
	G,G'	yw,hsflp; UAS-cg25cGFP/+; Act<CD2+<Gal4, UAS-mRFP/UAS-vkgGFP	37C° 30min	15
	H,I	vkg-GFP[CC00791]/CyO	-	14
	H,I	yw,UAS-trol[GS7407]/+;tj-Gal4/vkg-GFP; tubGal80[TS]/+	29C° 3 days	10
	H,I	tj-Gal4, vkg-GFP/UAS-domeΔCyt[3-1]; tubGal80[TS]/+	29C° 3 days	8
	H,I	vkg-GFP/CyO; fat2[KO]	-	5
	J	Ore-R	-	64
	J	yw,UAS-trol[GS7407]/+;tj-Gal4/tubGal80[TS]/+	29C° 3 days	45
	J	tj-Gal4/UAS-domeΔCyt[3-1]; tubGal80[TS]/+	29C° 3 days	51
	K	Ore-R	-	56
	K	yw,UAS-trol[GS7407]/+;tj-Gal4/tubGal80[TS]/+	29C° 3 days	16
	K	tj-Gal4/UAS-domeΔCyt[3-1]; tubGal80[TS]/+	29C° 3 days	15
	L	Ore-R	-	43
	L	yw,UAS-trol[GS7407]/+;tj-Gal4/tubGal80[TS]/+	29C° 3 days	52
	L	tj-Gal4/UAS-domeΔCyt[3-1]; tubGal80[TS]/+	29C° 3 days	45
F1-S1	C,E	vkg-GFP	29C° 18hrs	30
	D,E	tj-Gal4, vkg-GFP; UAS-DTI, tubGal80[TS]	29C° 18hrs	27
	G-G"	Ecad-GFP[KI]	-	28
	H-H'	sqh-GFP	-	26
F1-S2	B	Ore-R	-	1
F1-S3	A	Ecad-GFP[KI]	-	4
	B	sqh-GFP	-	3
	C	Ore-R	-	13
F5-S1	A-D	tj-gal4	-	48
	A-D	fat2[KO]	-	73
	A-D	fat2[58D]	-	68
F5-S2	A	10xSTAT-GFP	-	5
	A	10xSTAT-GFP/tj-Gal4; UAS-fat2 KD	29C° 3 days	5
F5-S3	A-D	Ore-R	-	10
	A-D	tj-Gal4/+; tubGal80[TS]/UAS-abi KD[HMS01597] (St. 2-4)	29C° 20hrs > 25C° 17hrs	13
	A-D	tj-Gal4/+; tubGal80[TS]/UAS-abi KD[HMS01597] (St. 5-8)	29C° 8hrs	19
Movie 1		yw; vkg-GFP; His2Av-mRFP	-	11
Movie 2		vkg-GFP; fat2[KO]	-	10
Movie 3		vkg-GFP/CyO	-	10
Movie 3		yw,GSV-trol/+;tj-Gal4/vkg-GFP; tubGal80[TS]/+	29C° 3 days	6
Movie 3		tj-Gal4, vkg-GFP/UAS-domeΔCyt[3-1]; tubGal80[TS]/+	29C° 3 days	6
Movie 3		tj-Gal4/+; tubGal80[TS]/UAS-abi KD[HMS01597]	29C° 8hrs	6
Movie 4		Ore-R	-
Movie 4		fat2[KO]	-
Movie 4		tj-Gal4/UAS-ehbp1; tubGal80[TS]/+	same as fig 3
Movie 4		UAS-ehbp1/+; fru-Gal4[TS]/+	same as fig 3
Movie 4		UAS-vkg KD[111688]/+; mirr-Gal4, tubG80[TS]/UAS-cg25c KD [HMC02910]	same as fig 3
