# Supplementary figures and images for: Organ sculpting by patterned extracellular matrix stiffness
Source: eLife journal article supplement (doi:10.7554/elife.24958), 2017-06-27

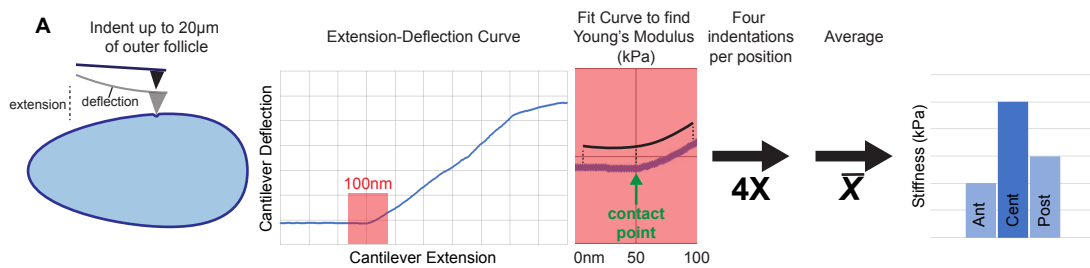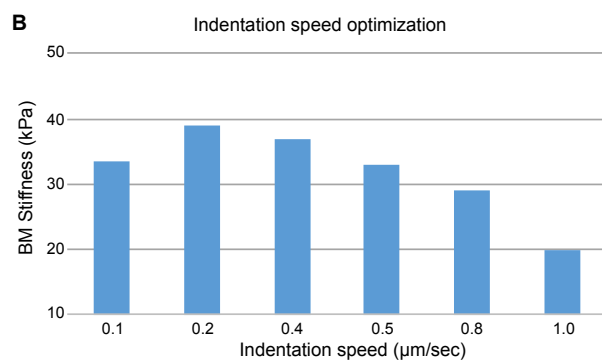

Supplement: supp [file elife-24958-supp-v1.zip]

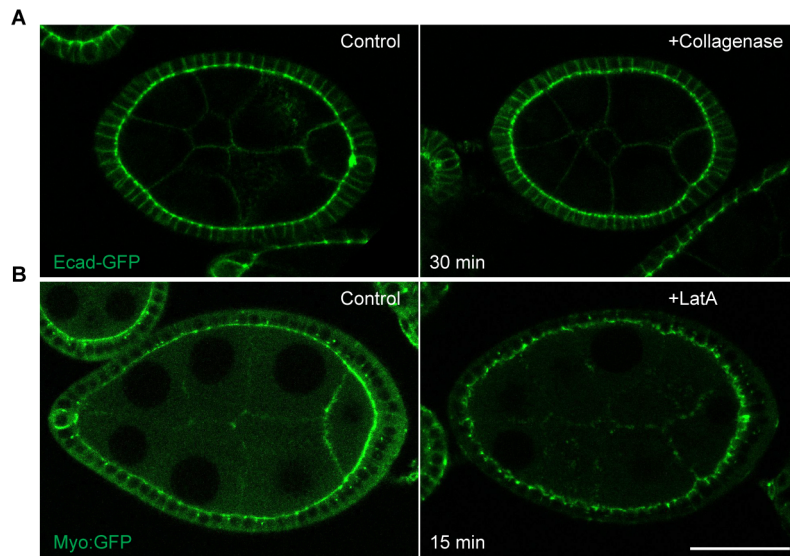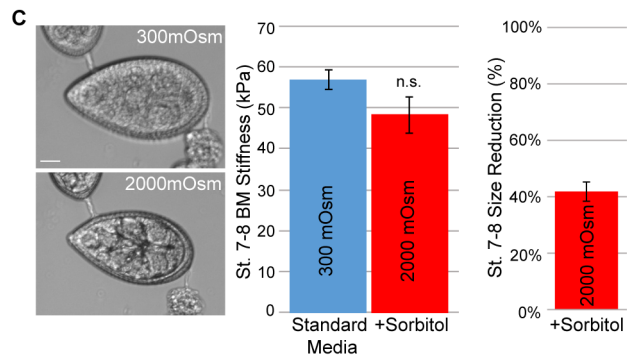

Supplement: supp [file elife-24958-supp-v1.zip]

A

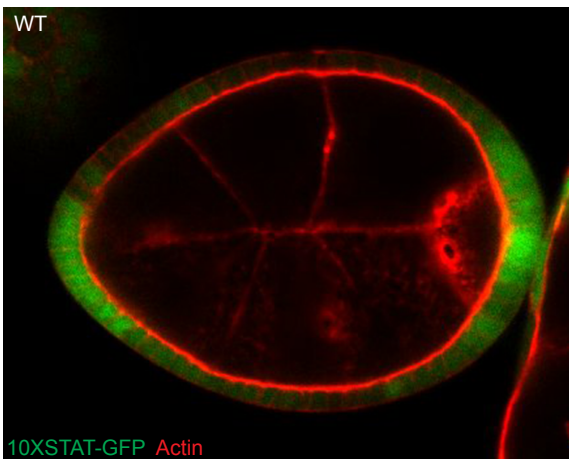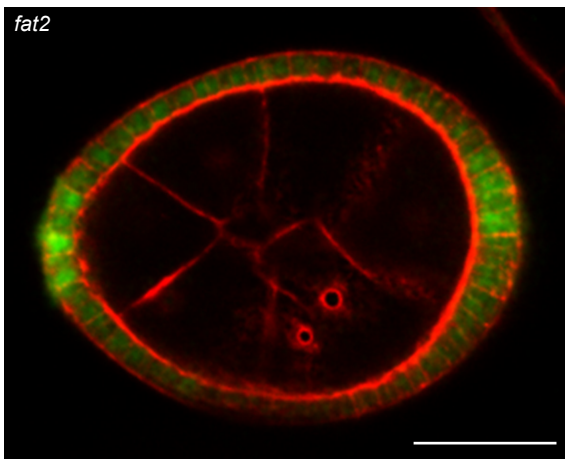

Supplement: supp [file elife-24958-supp-v1.zip]

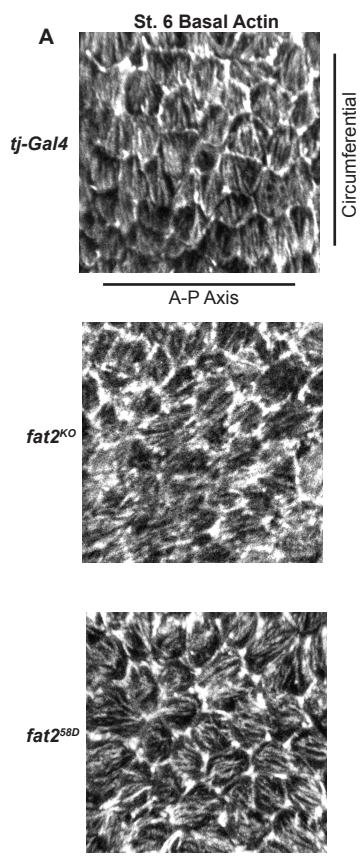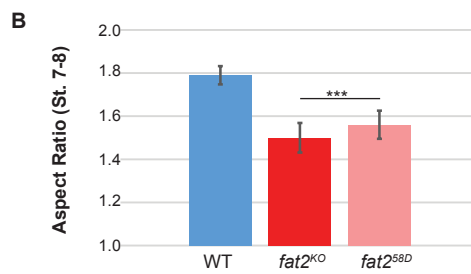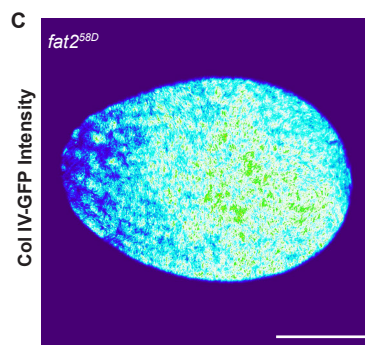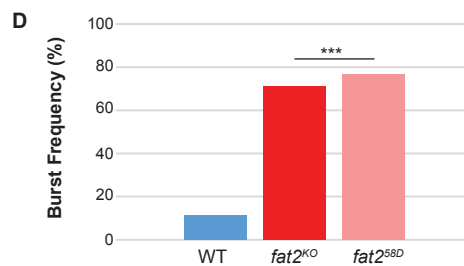

Supplement: supp [file elife-24958-supp-v1.zip]

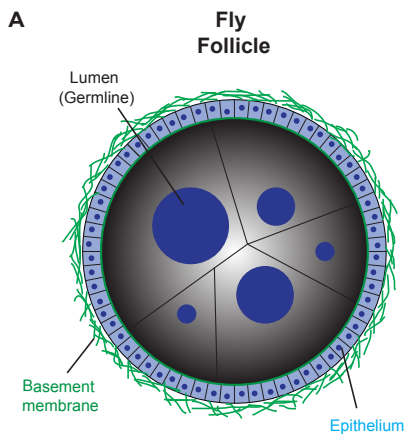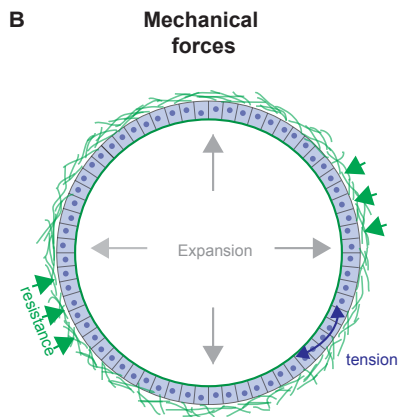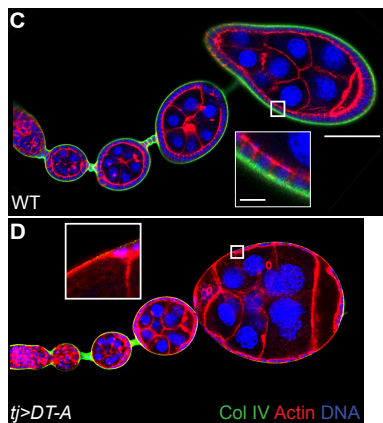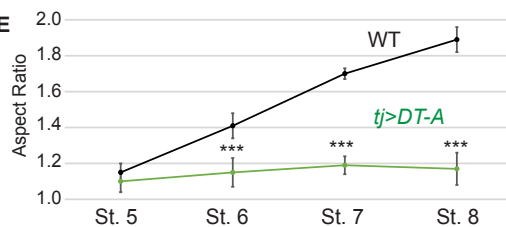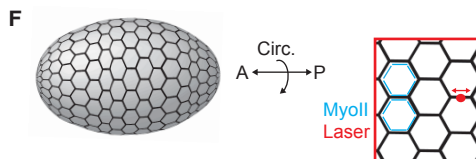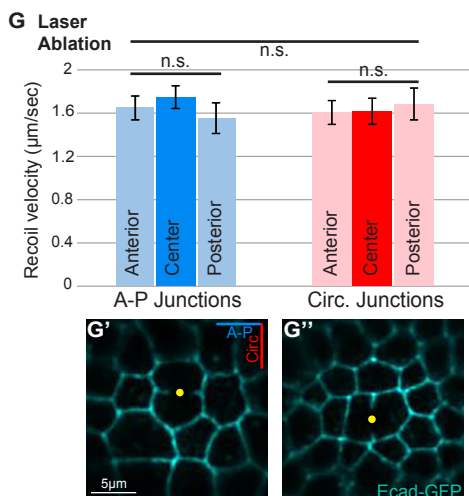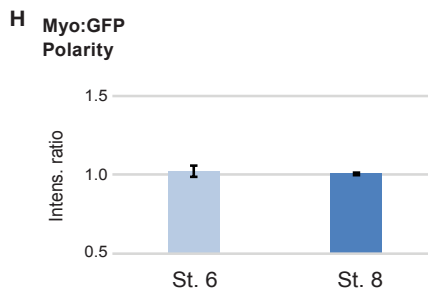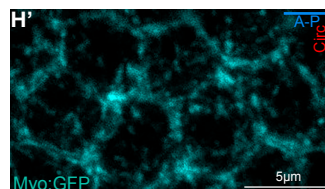

Supplement: supp [file elife-24958-supp-v1.zip]
